# Supplementary material
Source: PubMed Central journal article supplement (PMC2577162)
Supplement: NIHMS63304-supplement-1si20070305_08.pdf [file NIHMS63304-supplement-1si20070305_08.pdf]

## SUPPORTING INFORMATION

### **Mobilization of Arsenic during One-Year Incubations of Grey Aquifer Sands from Araihasar, Bangladesh**

Kathleen A. Radloff\*, Zhongqi Cheng, Mohammad W. Rahman, Kazi M. Ahmed, Brian J. Mailloux, Andrew R. Juhl, Peter Schlosser, and Alexander van Geen

Columbia University  
Department of Earth and Environmental Engineering  
phone: 845-365-8412  
fax: 845-365-8154  
email: kar2108@columbia.edu

Prepared for Environmental Science and Technology

Date: 5 March 2007

Total Pages: 9

Dissolved concentrations of Fe, As, Mn, S, P and the major cations (Na, Mg, K and Ca) are reported for both the site profiles and the incubations. Fe and As sediment concentrations from the HCl and phosphate extractions are given. The values used for the Langmuir calculations of increased surface site availability are reported.

Content:

Table S1. Site Profile Data. Dissolved concentrations of Fe, As, Mn, S, P, Na, Mg, K and Ca collected using the needle sampler in January and April 2005.

Table S2. Results of the HCl and phosphate sediment extractions.

Table S3 and Figure S1. Dissolved Fe concentrations throughout incubation.

Table S4 and Figure S2. Dissolved As concentrations throughout incubation.

Table S5 and Figure S3. Dissolved Mn concentrations throughout incubation.

Table S6 and Figure S4. Dissolved S concentrations throughout incubation.

Table S7 and Figure S5. Dissolved P concentrations throughout incubation.

Table S8 and Figure S6. Dissolved concentrations of the major cations throughout incubation.

Table S9. Groundwater volume changes for each amendment.

Table S1. Needle Sampler Profiles from Jan and April 2005

|          |            |            |            |           |           |           |            |            |            |            |                        |            | Extractions |                        |  |
|----------|------------|------------|------------|-----------|-----------|-----------|------------|------------|------------|------------|------------------------|------------|-------------|------------------------|--|
|          | Depth<br>m | Na<br>mg/L | Mg<br>mg/L | P<br>mg/L | S<br>mg/L | K<br>mg/L | Ca<br>mg/L | Mn<br>mg/L | Fe<br>mg/L | As<br>ug/L | Major Cations<br>meq/L | Depth<br>m | As<br>mg/kg | Fe(II)/tot Fe<br>ratio |  |
| Jan-05   |            |            |            |           |           |           |            |            |            |            |                        |            |             |                        |  |
| NS32-1   | 4.0        | 19.5       | 18.1       | 0.9       | 2.4       | 3.0       | 62.7       | 1.1        | 1.1        | 22.0       | 5.4                    | 4.0        | 1.13        | 0.53                   |  |
| NS32-2   | 4.3        | 19.6       | 18.1       | 0.9       | 3.8       | 2.8       | 62.8       | 1.6        | 0.0        | 39.8       | 5.4                    | 4.3        | 1.49        |                        |  |
| NS32-3   | 6.1        | 21.1       | 16.5       | 0.4       | 5.1       | 3.5       | 65.4       | 1.5        | 0.0        | 101.6      | 5.4                    | 6.1        | 2.72        | 0.55                   |  |
| NS32-4   | 6.4        | 29.3       | 14.5       | 0.1       | 9.8       | 3.1       | 60.7       | 1.2        | 0.0        | 68.1       | 5.4                    | 6.4        | 2.02        |                        |  |
| NS32-5   | 7.6        | 18.5       | 18.0       | 0.1       | 3.8       | 2.6       | 77.0       | 2.4        | 0.1        | 67.3       | 6.0                    | 7.6        | 1.62        | 0.55                   |  |
| NS32-6   | 7.9        | 18.8       | 17.8       | 0.1       | 4.1       | 2.8       | 76.0       | 2.4        | 0.1        | 67.5       | 5.9                    | 7.9        | 1.03        |                        |  |
| NS32-7   | 10.7       | 20.2       | 15.6       | 0.1       | 5.9       | 3.1       | 61.7       | 1.8        | 1.8        | 78.3       | 5.1                    | 10.7       | 1.81        | 0.53                   |  |
| NS32-8   | 11.0       | 21.2       | 15.4       | 0.1       | 5.5       | 3.5       | 56.6       | 1.4        | 0.0        | 74.6       | 4.9                    | 11.0       | 0.14        | 0.60                   |  |
| NS32-9   | 11.3       | 20.4       | 15.9       | 0.1       | 5.1       | 3.0       | 60.8       | 2.0        | 0.3        | 83.1       | 5.1                    | 15.2       |             | 0.65                   |  |
| NS32-10  | 15.2       | 22.5       | 14.6       | 0.1       | 6.8       | 3.3       | 59.0       | 1.0        | 0.3        | 56.1       | 5.0                    |            |             |                        |  |
| NS32-11  | 15.5       | 24.4       | 14.3       | 0.0       | 7.3       | 3.1       | 58.9       | 1.0        | 0.0        | 49.8       | 5.1                    |            |             |                        |  |
| NS32-12  | 21.3       | 29.8       | 12.9       | 0.1       | 8.2       | 5.3       | 51.2       | 0.5        | 0.0        | 105.0      | 4.9                    | 21.3       |             | 0.71                   |  |
| NS32-13  | 21.6       | 38.3       | 9.9        | 0.0       | 11.7      | 5.0       | 41.2       | 0.2        | 0.1        | 23.3       | 4.5                    |            |             |                        |  |
| NS32-16  | 57.9       | 55.8       | 11.0       | 0.1       | 13.0      | 7.6       | 25.7       | 0.1        | 0.0        | 7.0        | 4.7                    |            |             |                        |  |
| NS32-17  | 58.2       | 69.0       | 8.6        | 0.1       | 12.6      | 6.6       | 17.4       | 0.0        | 0.1        | 8.8        | 4.7                    |            |             |                        |  |
| Apr-05   |            |            |            |           |           |           |            |            |            |            |                        |            |             |                        |  |
| NS32B-11 | 4.6        | 23.6       | 20.8       | 1.1       | 3.6       | 3.6       | 140.4      | 2.7        | 0.5        | 39.3       | 9.4                    | 4.6        | 0.51        | 0.63                   |  |
| NS32B-12 | 4.9        | 22.9       | 20.4       | 1.1       | 3.3       | 3.2       | 139.4      | 2.8        | 0.0        | 40.7       | 9.3                    | 11.6       | 1.42        | 0.67                   |  |
| NS32B-13 | 11.6       | 17.4       | 14.2       | 0.2       | 4.2       | 3.2       | 104.7      | 2.3        | 0.7        | 72.5       | 6.9                    | 37.5       | 0.29        | 0.84                   |  |
| NS32B-14 | 11.9       | 17.8       | 14.0       | 0.2       | 4.2       | 3.2       | 105.9      | 2.3        | 0.8        | 71.4       | 6.9                    |            |             |                        |  |
| NS32B-15 | 37.5       | 17.1       | 15.8       | 0.1       | 3.0       | 6.2       | 62.8       | 0.1        | 0.0        | 75.6       | 5.1                    |            |             |                        |  |
| NS32B-16 | 37.8       | 16.8       | 15.5       | 0.4       | 3.2       | 5.8       | 56.9       | 0.1        | 0.9        | 100.6      | 4.8                    |            |             |                        |  |
| NS32B-17 | 38.2       | 17.4       | 52.2       | 0.7       | 1.6       | 11.1      | 84.2       | 0.1        | 0.0        | 162.3      | 9.3                    |            |             |                        |  |
| NS32B-PW |            | 18.5       | 8.2        | 0.0       | 3.4       | 4.5       | 50.0       | 0.1        | 0.2        | 17.1       | 3.9                    |            |             |                        |  |
| NS32B-HW |            | 19.4       | 8.5        | 0.0       | 3.9       | 4.8       | 45.6       | 0.1        | 0.1        | 19.9       | 3.8                    |            |             |                        |  |

**Table S2. Results of the HCl and phosphate sediment extractions.**

|      |                  | Day 17 | Day 340   |         |        |
|------|------------------|--------|-----------|---------|--------|
|      |                  | All    | Unamended | Acetate | Oxygen |
| 5 m  | HCl-ext Fe g/kg  | 1.9    | 6.4       | 6.6     | 4.7    |
|      | Fe(II)/Fe(tot)   | 0.63   | 0.59      | 0.62    | 0.47   |
|      | HCl-ext As mg/kg |        | 1.3       | 1.5     | 0.8    |
|      | P-ext As mg/kg   | 0.5    | 0.44      | 0.38    | 0.25   |
| 12 m | HCl-ext Fe g/kg  | 2.9    | 5.9       | 5.7     | 6.2    |
|      | Fe(II)/Fe(tot)   | 0.67   | 0.47      | 0.65    | 0.47   |
|      | HCl-ext As mg/kg |        | 1.5       | 1.2     | 1.14   |
|      | P-ext As mg/kg   | 1.4    | 0.56      | 0.54    | 0.42   |
| 38 m | HCl-ext Fe g/kg  | 6.6    | 8.6       | 9.7     | 7.5    |
|      | Fe(II)/Fe(tot)   | 0.84   | 0.76      | 0.77    | 0.43   |
|      | HCl-ext As mg/kg |        | 1.4       | 0.93    | 0.5    |
|      | P-ext As mg/kg   | 0.3    | 0.24      | 0.24    | 0.36   |

Table S3. Dissolved Fe concentrations throughout incubation.

| Depth | Day Amendment | Sample A |      | Sample B |      |      |      |      |       |      | in mg/L |
|-------|---------------|----------|------|----------|------|------|------|------|-------|------|---------|
|       |               | 0        | 0    | 17       | 23   | 40   | 99   | 160  | 252   | 340  |         |
| 5m    | Unamended     | 0.48     | 0.10 | 0.10     | 0.10 | 0.14 | 0.07 | 0.14 | 1.03  | 0.24 |         |
|       | Acetate       |          |      |          | 0.10 | 0.10 | 0.10 | 0.11 | 4.58  | 6.37 |         |
|       | Oxygen        |          |      | 1.39     | 0.24 | 0.10 | 0.10 | 0.10 | 0.10  | 0.10 |         |
| 12m   | Unamended     | 0.73     | 0.77 | 0.28     | 0.13 | 0.23 | 0.06 | 1.23 | 14.80 | 0.88 |         |
|       | Acetate       |          |      |          | 0.17 | 0.23 | 0.19 | 0.56 | 21.51 | 0.15 |         |
|       | Oxygen        |          |      |          | 0.10 | 0.30 | 0.10 | 0.10 | 0.25  | 0.10 |         |
| 38m   | Unamended     | 0.10     | 0.88 | 1.31     | 0.30 | 0.42 | 0.55 | 0.73 | 33.03 | 3.09 |         |
|       | Acetate       |          |      |          | 0.38 | 0.82 | 0.42 | 0.58 | 32.48 | 0.41 |         |
|       | Oxygen        |          |      |          | 0.33 | 0.54 | 0.10 | 0.10 | 0.10  | 0.10 |         |

Numbers in red indicate below the detection limit

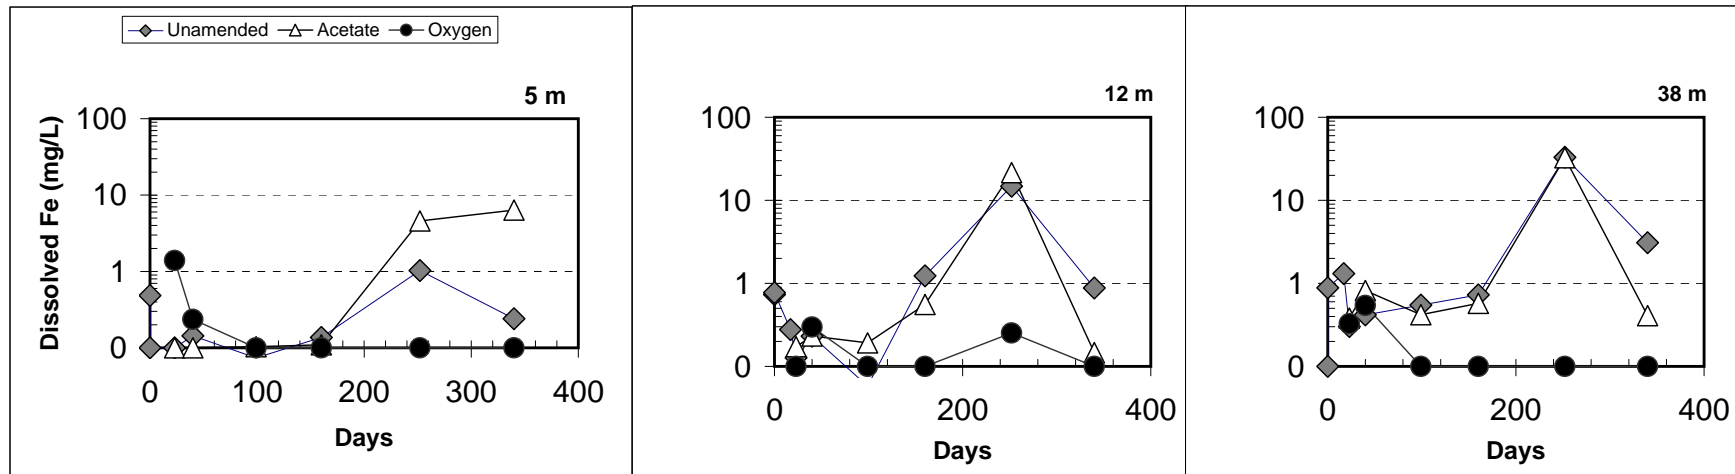

Figure S1. Dissolved Fe concentrations throughout incubation by depth and amendment type.

**Table S4. Dissolved As concentrations throughout incubation.**

| Depth | Day Amendment | Sample A |        | Sample B |        | in ug/L |        |        |        |        |  |
|-------|---------------|----------|--------|----------|--------|---------|--------|--------|--------|--------|--|
|       |               | 0        | 0      | 17       | 23     | 40      | 99     | 160    | 252    | 340    |  |
| 5m    | Unamended     | 39.30    | 40.72  | 27.70    | 25.47  | 30.74   | 24.94  | 54.68  | 52.46  | 46.30  |  |
|       | Acetate       |          |        |          | 25.87  | 28.37   | 37.18  | 50.59  | 46.52  | 70.44  |  |
|       | Oxygen        |          |        |          | 23.96  | 31.30   | 5.55   | 4.24   | 1.36   | 1.82   |  |
| 12m   | Unamended     | 72.47    | 71.42  | 37.80    | 49.40  | 53.97   | 53.92  | 67.32  | 68.73  | 83.89  |  |
|       | Acetate       |          |        |          | 47.91  | 56.60   | 65.14  | 88.23  | 92.99  | 76.32  |  |
|       | Oxygen        |          |        |          | 47.08  | 41.45   | 3.73   | 1.11   | 3.62   | 1.60   |  |
| 38m   | Unamended     | 75.58    | 100.61 | 113.90   | 140.34 | 130.48  | 108.71 | 134.59 | 110.33 | 149.98 |  |
|       | Acetate       |          |        |          | 117.45 | 136.00  | 114.90 | 122.17 | 99.68  | 113.63 |  |
|       | Oxygen        |          |        |          | 114.93 | 118.94  | 0.86   | 0.15   | 0.45   | 0.51   |  |

Numbers in red indicate below the detection limit

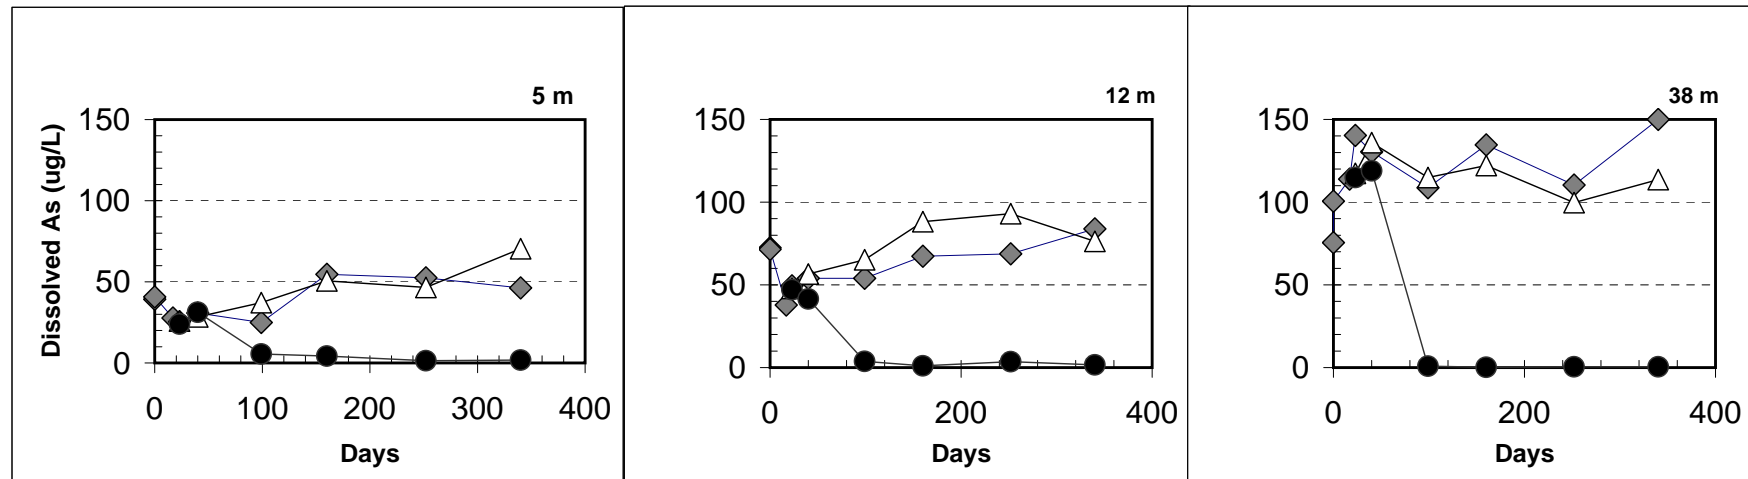

**Figure S2. Dissolved As concentrations throughout incubation by depth and amendment type.**

Table S5. Dissolved Mn concentrations throughout incubation.

| Depth | Day Amendment | Sample A |      | Sample B |      |      |      |      |      |      | in mg/L |
|-------|---------------|----------|------|----------|------|------|------|------|------|------|---------|
|       |               | 0        | 0    | 17       | 23   | 40   | 99   | 160  | 252  | 340  |         |
| 5m    | Unamended     | 2.73     | 2.83 | 1.50     | 0.59 | 0.53 | 0.28 | 0.29 | 0.28 | 0.18 |         |
|       | Acetate       |          |      |          | 0.56 | 0.51 | 0.34 | 0.32 | 1.25 | 4.78 |         |
|       | Oxygen        |          |      |          | 0.64 | 1.02 | 0.41 | 0.01 | 0.02 | 0.01 |         |
| 12m   | Unamended     | 2.33     | 2.32 | 1.17     | 0.49 | 0.50 | 0.31 | 0.54 | 1.92 | 0.68 |         |
|       | Acetate       |          |      |          | 0.50 | 0.56 | 0.38 | 0.40 | 2.28 | 0.22 |         |
|       | Oxygen        |          |      |          | 0.54 | 0.81 | 0.37 | 0.03 | 0.90 | 0.20 |         |
| 38m   | Unamended     | 0.08     | 0.06 | 0.11     | 0.07 | 0.12 | 0.15 | 0.19 | 1.46 | 0.68 |         |
|       | Acetate       |          |      |          | 0.06 | 0.08 | 0.08 | 0.13 | 1.03 | 0.11 |         |
|       | Oxygen        |          |      |          | 0.09 | 0.08 | 0.01 | 0.02 | 0.02 | 0.01 |         |

Numbers in red indicate below the detection limit

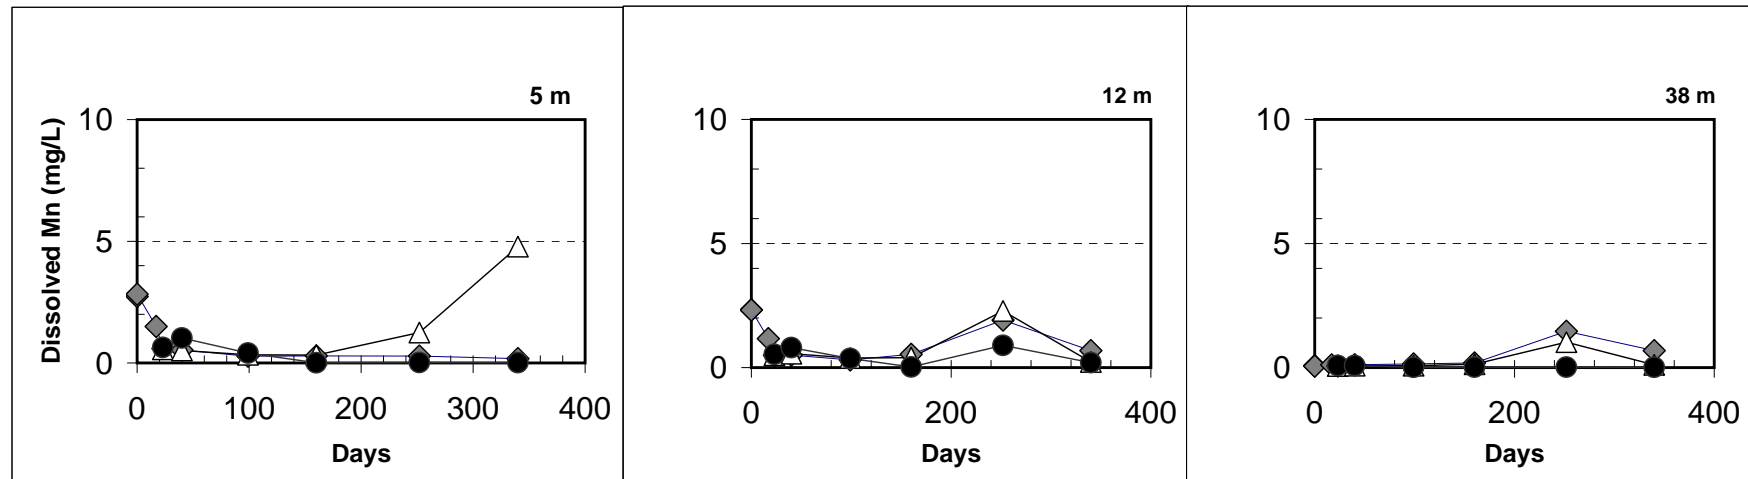

Figure S3. Dissolved Mn concentrations throughout incubation by depth and amendment type.

**Table S6. Dissolved S concentrations throughout incubation.**

| Depth | Day Amendment | Sample A |      | Sample B |      |      |       |       |       |       | in mg/L |
|-------|---------------|----------|------|----------|------|------|-------|-------|-------|-------|---------|
|       |               | 0        | 0    | 17       | 23   | 40   | 99    | 160   | 252   | 340   |         |
| 5m    | Unamended     | 3.59     | 3.29 | 0.39     | 0.40 | 3.22 | 0.42  | 0.18  | 0.21  | 0.19  |         |
|       | Acetate       |          |      |          | 0.22 | 0.24 | 0.15  | 0.15  | 0.15  | 0.63  |         |
|       | Oxygen        |          |      |          | 0.42 | 0.15 | 1.83  | 2.16  | 1.64  | 1.39  |         |
| 12m   | Unamended     | 4.19     | 4.20 | 1.86     | 0.29 | 0.15 | 0.15  | 0.63  | 0.15  | 0.15  |         |
|       | Acetate       |          |      |          | 0.24 | 0.27 | 0.15  | 0.15  | 0.15  | 0.15  |         |
|       | Oxygen        |          |      |          | 0.32 | 1.68 | 3.36  | 3.75  | 3.20  | 2.99  |         |
| 38m   | Unamended     | 3.04     | 3.24 | 0.46     | 0.71 | 0.75 | 0.15  | 0.21  | 0.15  | 1.50  |         |
|       | Acetate       |          |      |          | 0.39 | 0.26 | 0.15  | 2.30  | 0.58  | 0.31  |         |
|       | Oxygen        |          |      |          | 0.42 | 0.19 | 14.98 | 41.32 | 46.90 | 53.47 |         |

Numbers in red indicate below the detection limit

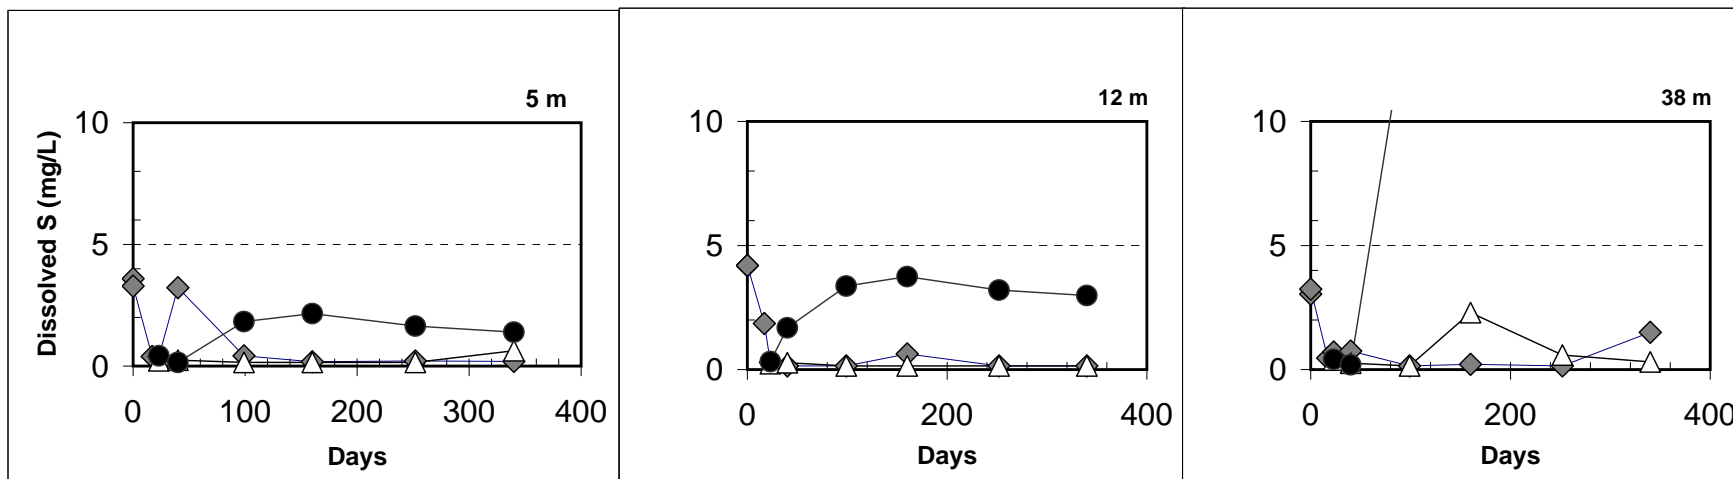

**Figure S4. Dissolved S concentrations throughout incubation by depth and amendment type.**

Table S7. Dissolved P concentrations throughout incubation.

| Depth | Day Amendment | Sample A |      | Sample B |      |      |      |      |       |      | in mg/L |
|-------|---------------|----------|------|----------|------|------|------|------|-------|------|---------|
|       |               | 0        | 0    | 17       | 23   | 40   | 99   | 160  | 252   | 340  |         |
| 5m    | Unamended     | 1.12     | 1.10 | 2.02     | 2.45 | 2.44 | 0.02 | 3.16 | 41.92 | 2.32 |         |
|       | Acetate       |          |      |          | 2.32 | 2.17 | 1.89 | 2.37 | 9.43  | 0.88 |         |
|       | Oxygen        |          |      |          | 2.43 | 2.19 | 0.38 | 0.32 | 0.06  | 0.05 |         |
| 12m   | Unamended     | 0.16     | 0.19 | 0.44     | 0.72 | 2.09 | 0.65 | 1.25 | 4.64  | 1.53 |         |
|       | Acetate       |          |      |          | 0.62 | 0.78 | 0.80 | 1.08 | 3.94  | 1.45 |         |
|       | Oxygen        |          |      |          | 0.66 | 0.37 | 0.02 | 0.02 | 0.08  | 0.04 |         |
| 38m   | Unamended     | 0.06     | 0.38 | 1.36     | 1.86 | 1.83 | 1.08 | 2.05 | 4.36  | 1.75 |         |
|       | Acetate       |          |      |          | 1.57 | 1.93 | 1.55 | 0.02 | 0.02  | 2.50 |         |
|       | Oxygen        |          |      |          | 1.36 | 1.13 | 0.02 | 0.02 | 0.02  | 0.04 |         |

Numbers in red indicate below the detection limit

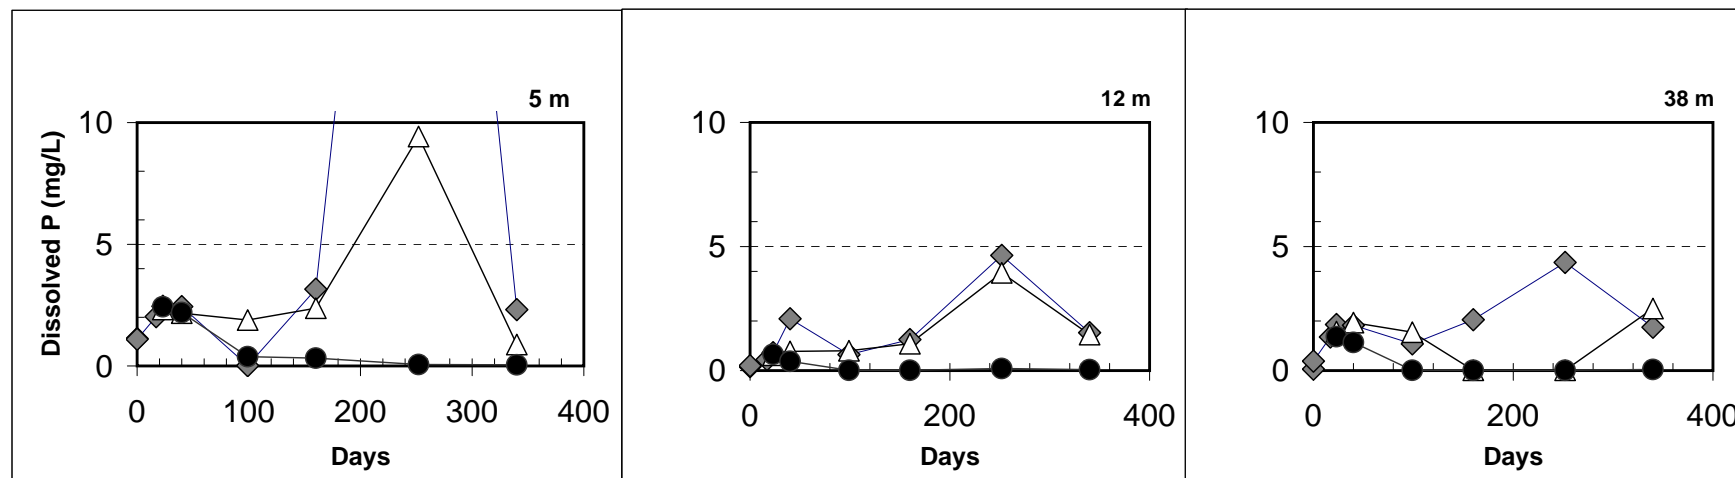

Figure S5. Dissolved P concentrations throughout incubation by depth and amendment type.



**Table S8. Dissolved concentrations of the major cations (Na, Mg, K and Ca) throughout incubation.**

| Depth | Day Amendment | Sample A |      | Sample B |      |      |      |      |      |      | in meq/L |
|-------|---------------|----------|------|----------|------|------|------|------|------|------|----------|
|       |               | 0        | 0    | 17       | 23   | 40   | 99   | 160  | 252  | 340  |          |
| 5m    | Unamended     | 9.39     | 9.26 | 7.65     | 5.98 | 7.43 | 6.03 | 4.63 | 6.38 | 3.87 |          |
|       | Acetate       |          |      |          | 6.41 | 5.89 | 4.95 | 5.44 | 5.72 | 9.61 |          |
|       | Oxygen        |          |      |          | 6.02 | 5.88 | 6.93 | 5.39 | 5.75 | 6.86 |          |
| 12m   | Unamended     | 6.89     | 6.95 | 5.66     | 4.28 | 4.11 | 3.33 | 3.75 | 4.22 | 4.60 |          |
|       | Acetate       |          |      |          | 4.80 | 4.97 | 4.37 | 4.62 | 5.75 | 4.05 |          |
|       | Oxygen        |          |      |          | 4.53 | 4.34 | 4.05 | 3.73 | 5.26 | 5.77 |          |
| 38m   | Unamended     | 5.13     | 4.82 | 4.88     | 4.06 | 4.42 | 3.51 | 3.80 | 5.94 |      |          |
|       | Acetate       |          |      |          | 4.43 | 5.07 | 4.00 | 4.03 | 6.30 | 3.60 |          |
|       | Oxygen        |          |      |          | 3.77 | 3.84 | 3.34 | 5.85 | 7.84 | 8.67 |          |

Numbers in red indicate below the detection limit

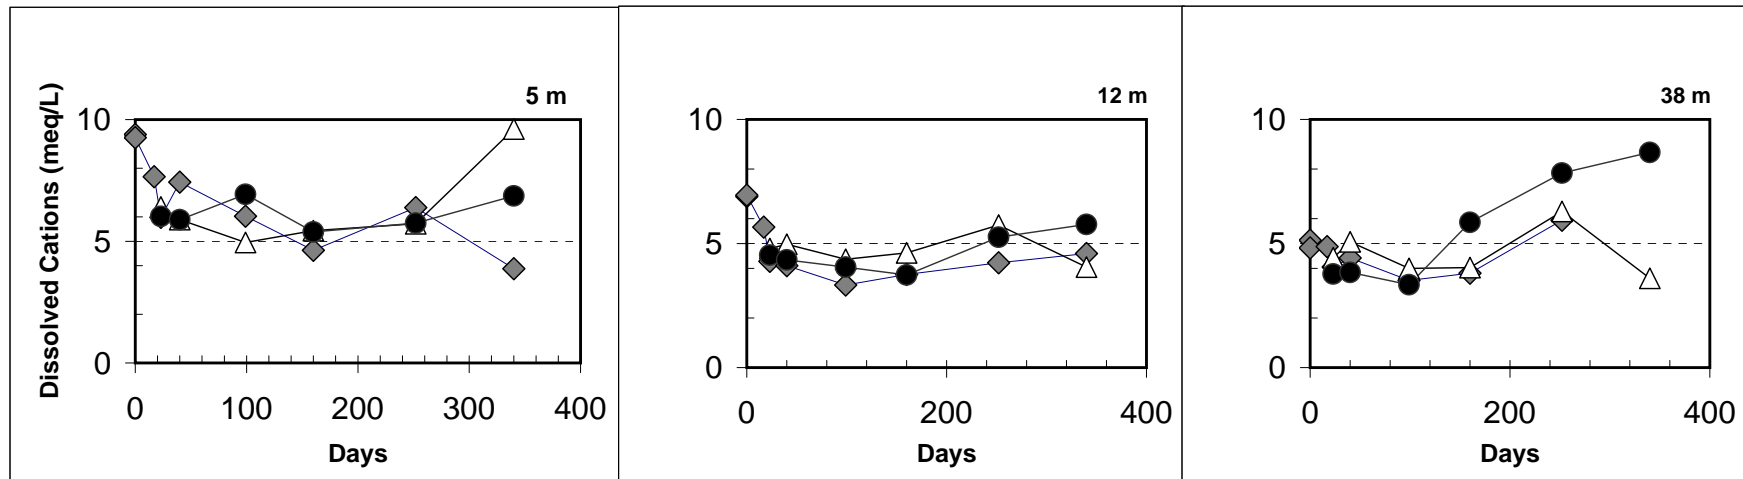

**Figure S6. Dissolved concentrations of the major cations throughout incubation by depth and amendment type.**

**Langmuir calculations**

$$K(\text{abs}) = \frac{[SA]}{([S]*[A])}$$

K(abs) is constant

$$K(\text{abs}) = \frac{[SA(0)]}{([S(0)]*[A(0)])} \quad \text{where (0) is for day 0}$$

$$= \frac{[SA(17)]}{([S(17)]*[A(17)])} \quad \text{where (17) is for day 17}$$

| <b>Known</b> |       | 5 m | 12 m | 38m | in unamended samples |
|--------------|-------|-----|------|-----|----------------------|
| [A(0)]       | ug/L  | 40  | 72   | 88  |                      |
| [A(17)]      | ug/L  | 28  | 38   | 114 |                      |
| [SA(17)]     | mg/kg | 0.5 | 1.4  | 0.3 |                      |

Assuming that the change in As all is due to adsorption [A(0)]-[A(17)]

|         |       |       |       |       |
|---------|-------|-------|-------|-------|
| [SA(0)] | mg/kg | 0.491 | 1.368 | 0.363 |
|---------|-------|-------|-------|-------|

solve equation for [S(17)]/[S(0)]

|                             |             |             |             |
|-----------------------------|-------------|-------------|-------------|
| <b>[S(17)]/[S(0)] ratio</b> | <b>1.45</b> | <b>1.94</b> | <b>0.64</b> |
|-----------------------------|-------------|-------------|-------------|

**Table S9. Groundwater volume changes for each amendment.**

| <b>Depth</b> | <b>Amendment</b> | <b>Sediment<br/>g</b> | <b>Starting Volume<br/>mL</b> | <b>End Volume<br/>mL</b> |
|--------------|------------------|-----------------------|-------------------------------|--------------------------|
| 5m           | Unamended        | 11.20                 | 8.4                           | 2.4                      |
|              | Acetate          | 9.82                  | 7.9                           | 1.9                      |
|              | Oxygen           | 7.67                  | 8.9                           | 2.9                      |
| 12m          | Unamended        | 10.92                 | 10.4                          | 4.4                      |
|              | Acetate          | 9.11                  | 12.0                          | 5.9                      |
|              | Oxygen           | 8.51                  | 8.4                           | 2.4                      |
| 38m          | Unamended        | 6.16                  | 14.9                          | 8.9                      |
|              | Acetate          | 8.19                  | 13.4                          | 7.4                      |
|              | Oxygen           | 5.01                  | 10.9                          | 4.9                      |
